# Supplementary material for: Desarrollo Web con PHP y MySQL
Source: Royal Society of Chemistry journal article supplement (doi:10.1039/d2ra01021f), 2005-01-01
Supplement: d2ra01021f3.pdf [file d2ra01021f3.pdf]

## Supporting Information:

### Revealing the different performance of $\text{Li}_4\text{SiO}_4$ and $\text{Ca}_2\text{SiO}_4$ for $\text{CO}_2$ adsorption by density functional theory

Wenjing Yu<sup>a</sup>, Qian Xu<sup>\*a</sup>, Shenggang Li<sup>\*b</sup>, Xiaolu Xiong<sup>a</sup>, Hongwei Cheng<sup>a</sup>, Xingli Zou<sup>a</sup> and

Xionggang Lu<sup>a</sup>

<sup>a</sup> The State Key Laboratory of Advanced Special Steel, Shanghai Key Laboratory of Advanced Ferrometallurgy, School of Materials Science and Engineering, Shanghai University, Shanghai, P. R. China

<sup>b</sup> CAS Key Laboratory of Low-Carbon Conversion Science and Engineering, Shanghai Advanced Research Institute, Chinese Academy of Sciences, Shanghai, P. R. China

Corresponding author. E-mail: [qianxu@shu.edu.cn](mailto:qianxu@shu.edu.cn) (Qian Xu); [lsg@sari.ac.cn](mailto:lsg@sari.ac.cn) (S. Li)

**Table S1** Mulliken charge analysis of Li atoms in  $\text{Li}_4\text{SiO}_4$ .

| Atom | Mulliken charge | Atom | Mulliken charge | Atom | Mulliken charge | Atom | Mulliken charge |
|------|-----------------|------|-----------------|------|-----------------|------|-----------------|
| Li1  | 0.84            | Li15 | 0.86            | Li29 | 0.84            | Li43 | 0.84            |
| Li2  | 0.84            | Li16 | 0.88            | Li30 | 0.84            | Li44 | 0.80            |
| Li3  | 0.84            | Li17 | 0.87            | Li31 | 0.84            | Li45 | 0.79            |
| Li4  | 0.84            | Li18 | 0.85            | Li32 | 0.87            | Li46 | 0.80            |
| Li5  | 0.87            | Li19 | 0.84            | Li33 | 0.86            | Li47 | 0.85            |
| Li6  | 0.86            | Li20 | 0.84            | Li34 | 0.88            | Li48 | 0.84            |
| Li7  | 0.88            | Li21 | 0.84            | Li35 | 0.87            | Li49 | 0.86            |
| Li8  | 0.87            | Li22 | 0.84            | Li36 | 0.85            | Li50 | 0.88            |
| Li9  | 0.85            | Li23 | 0.87            | Li37 | 0.85            | Li51 | 0.84            |
| Li10 | 0.84            | Li24 | 0.86            | Li38 | 0.84            | Li52 | 0.83            |
| Li11 | 0.84            | Li25 | 0.88            | Li39 | 0.86            | Li53 | 0.84            |
| Li12 | 0.84            | Li26 | 0.87            | Li40 | 0.88            | Li54 | 0.80            |
| Li13 | 0.84            | Li27 | 0.85            | Li41 | 0.84            | Li55 | 0.79            |
| Li14 | 0.87            | Li28 | 0.84            | Li42 | 0.83            | Li56 | 0.80            |

**Table S2** Mulliken charge analysis of O atoms in  $\text{Li}_4\text{SiO}_4$ .

| Atom | Mulliken charge | Atom | Mulliken charge | Atom | Mulliken charge | Atom | Mulliken charge |
|------|-----------------|------|-----------------|------|-----------------|------|-----------------|
| O1   | -1.27           | O15  | -1.27           | O29  | -1.29           | O43  | -1.29           |
| O2   | -1.27           | O16  | -1.27           | O30  | -1.25           | O44  | -1.25           |
| O3   | -1.28           | O17  | -1.28           | O31  | -1.29           | O45  | -1.29           |
| O4   | -1.27           | O18  | -1.27           | O32  | -1.29           | O46  | -1.29           |
| O5   | -1.26           | O19  | -1.26           | O33  | -1.26           | O47  | -1.26           |

|     |       |     |       |     |       |     |       |
|-----|-------|-----|-------|-----|-------|-----|-------|
| O6  | -1.27 | O20 | -1.27 | O34 | -1.24 | O48 | -1.24 |
| O7  | -1.29 | O21 | -1.29 | O35 | -1.27 | O49 | -1.27 |
| O8  | -1.27 | O22 | -1.27 | O36 | -1.28 | O50 | -1.28 |
| O9  | -1.27 | O23 | -1.27 | O37 | -1.28 | O51 | -1.28 |
| O10 | -1.28 | O24 | -1.28 | O38 | -1.27 | O52 | -1.27 |
| O11 | -1.27 | O25 | -1.27 | O39 | -1.29 | O53 | -1.29 |
| O12 | -1.26 | O26 | -1.26 | O40 | -1.27 | O54 | -1.27 |
| O13 | -1.27 | O27 | -1.27 | O41 | -1.28 | O55 | -1.28 |
| O14 | -1.29 | O28 | -1.29 | O42 | -1.28 | O56 | -1.28 |

**Table S3** Mulliken charge analysis of Ca and O atoms in Ca<sub>2</sub>SiO<sub>4</sub>.

| Atom | Mulliken charge | Atom | Mulliken charge | Atom | Mulliken charge | Atom | Mulliken charge |
|------|-----------------|------|-----------------|------|-----------------|------|-----------------|
| Ca1  | 1.27            | Ca7  | 1.27            | O5   | -1.09           | O11  | -1.10           |
| Ca2  | 1.26            | Ca8  | 1.26            | O6   | -1.10           | O12  | -1.10           |
| Ca3  | 1.27            | O1   | -1.09           | O7   | -1.10           | O13  | -1.09           |
| Ca4  | 1.26            | O2   | -1.10           | O8   | -1.10           | O14  | -1.10           |
| Ca5  | 1.27            | O3   | -1.10           | O9   | -1.09           | O15  | -1.10           |
| Ca6  | 1.26            | O4   | -1.10           | O10  | -1.10           | O16  | -1.10           |

Considering that the adsorption energy of adsorbed CO<sub>2</sub> in bent configuration is the lowest, the vibration frequencies were only calculated for this configuration, as displayed in Table S4. The vibrational frequencies of CO<sub>2</sub> adsorbed on Li<sub>4</sub>SiO<sub>4</sub> (010) and Ca<sub>2</sub>SiO<sub>4</sub> (100) surfaces shifted significantly from those of isolated CO<sub>2</sub> molecule. Fig.S1 shows the corresponding vibrational model of adsorbed CO<sub>2</sub>.

**Table S4** Vibrational frequencies (cm<sup>-1</sup>) of isolated and adsorbed CO<sub>2</sub> in bent configuration.

| Configuration                                                      | Asymmetric stretch | Symmetric stretch | Bending vibration | C-O <sub>s</sub> |
|--------------------------------------------------------------------|--------------------|-------------------|-------------------|------------------|
| Isolated CO <sub>2</sub>                                           | 2365               | 1334              | 646               |                  |
| adsorbed CO <sub>2</sub> on Li <sub>4</sub> SiO <sub>4</sub> (010) | 1568               | 1254              | 764               | 1006             |
| adsorbed CO <sub>2</sub> on Ca <sub>2</sub> SiO <sub>4</sub> (100) | 1679               | 1221              | 738               | 827              |

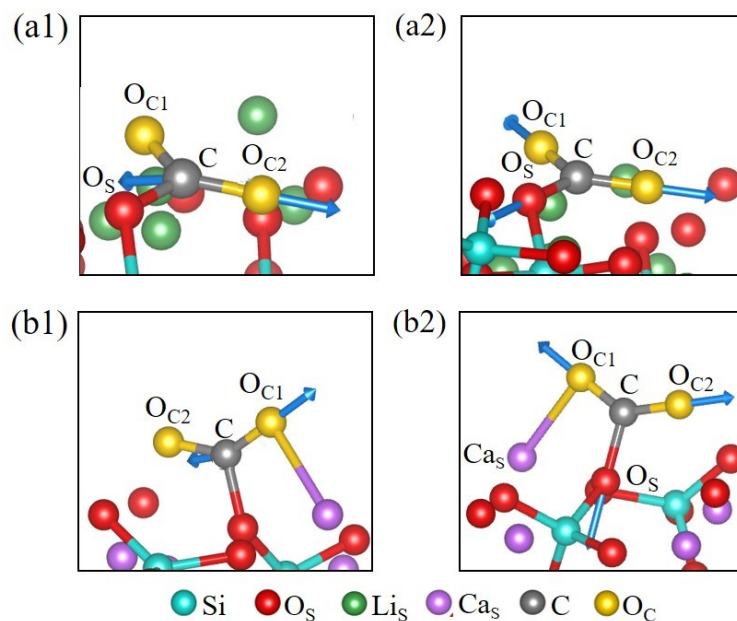

**Fig. S1.** Vibrational modes of adsorbed CO<sub>2</sub> molecule: (a1) asymmetric stretching, (a2) symmetric stretching on Li<sub>4</sub>SiO<sub>4</sub> (010) surface and (b1) asymmetric stretching, (b2) symmetric stretching on Ca<sub>2</sub>SiO<sub>4</sub> (100) surface.

**Table S5** The fractional coordinates of atoms in Li<sub>4</sub>SiO<sub>4</sub>.

| Atom | Fractional coordinates |           |           |
|------|------------------------|-----------|-----------|
|      | u                      | v         | w         |
| Li1  | 0.382673               | 0.002866  | 0.408360  |
| Li2  | 0.811847               | 0.002090  | 0.545327  |
| Li3  | 0.663326               | 0.006108  | 0.826900  |
| Li4  | 0.522364               | 1.004921  | 0.117369  |
| Li5  | 0.191649               | 0.969313  | 0.014491  |
| Li6  | 0.333241               | 0.964591  | 0.732463  |
| Li7  | 0.949715               | 0.031048  | 0.707157  |
| Li8  | 0.079250               | 0.014688  | 0.866891  |
| Li9  | 0.237800               | 0.038150  | 0.597954  |
| Li10 | -0.382670              | 0.502866  | -0.408360 |
| Li11 | -0.811850              | 0.502090  | -0.545330 |
| Li12 | -0.663330              | 0.506108  | -0.826900 |
| Li13 | -0.522360              | 1.504921  | -0.117370 |
| Li14 | -0.191650              | 1.469313  | -0.014490 |
| Li15 | -0.333240              | 1.464591  | -0.732460 |
| Li16 | -0.949720              | 0.531048  | -0.707160 |
| Li17 | -0.079250              | 0.514688  | -0.866890 |
| Li18 | -0.237800              | 0.538150  | -0.597950 |
| Li19 | -0.382670              | -0.002870 | -0.408360 |
| Li20 | -0.811850              | -0.002090 | -0.545330 |
| Li21 | -0.663330              | -0.006110 | -0.826900 |

|      |           |           |           |
|------|-----------|-----------|-----------|
| Li22 | -0.522360 | -1.004920 | -0.117370 |
| Li23 | -0.191650 | -0.969310 | -0.014490 |
| Li24 | -0.333240 | -0.964590 | -0.732460 |
| Li25 | -0.949720 | -0.031050 | -0.707160 |
| Li26 | -0.079250 | -0.014690 | -0.866890 |
| Li27 | -0.237800 | -0.038150 | -0.597950 |
| Li28 | 0.382673  | 0.497134  | 0.408360  |
| Li29 | 0.811847  | 0.497910  | 0.545327  |
| Li30 | 0.663326  | 0.493892  | 0.826900  |
| Li31 | 0.522364  | -0.504920 | 0.117369  |
| Li32 | 0.191649  | -0.469310 | 0.014491  |
| Li33 | 0.333241  | -0.464590 | 0.732463  |
| Li34 | 0.949715  | 0.468952  | 0.707157  |
| Li35 | 0.079250  | 0.485312  | 0.866891  |
| Li36 | 0.237800  | 0.461850  | 0.597954  |
| Li37 | 0.273809  | 0.250000  | 0.859186  |
| Li38 | 0.418333  | 0.250000  | 0.548899  |
| Li39 | 0.127996  | 0.250000  | 0.145984  |
| Li40 | 0.971183  | 0.250000  | 0.428925  |
| Li41 | 0.452137  | 0.250000  | 0.276875  |
| Li42 | 0.728182  | 0.250000  | 0.695152  |
| Li43 | 0.589839  | 0.250000  | 0.983003  |
| Li44 | 0.141723  | 0.250000  | 0.731525  |
| Li45 | 0.006133  | 0.250000  | 0.010710  |
| Li46 | 0.878098  | 0.250000  | 0.286783  |
| Li47 | -0.273810 | 0.750000  | -0.859190 |
| Li48 | -0.418330 | 0.750000  | -0.548900 |
| Li49 | -0.128000 | 0.750000  | -0.145980 |
| Li50 | -0.971180 | 0.750000  | -0.428930 |
| Li51 | -0.452140 | 0.750000  | -0.276880 |
| Li52 | -0.728180 | 0.750000  | -0.695150 |
| Li53 | -0.589840 | 0.750000  | -0.983000 |
| Li54 | -0.141720 | 0.750000  | -0.731530 |
| Li55 | -0.006130 | 0.750000  | -0.010710 |
| Li56 | -0.878100 | 0.750000  | -0.286780 |
| O1   | 0.356709  | 0.024866  | 0.060465  |
| O2   | 0.785475  | 0.030107  | 0.196306  |
| O3   | 0.498121  | 0.026844  | 0.770084  |
| O4   | 0.216536  | 0.023722  | 0.346294  |
| O5   | 0.068813  | 0.030602  | 0.637933  |
| O6   | 0.927391  | 0.030932  | 0.916095  |
| O7   | 0.654005  | 0.026732  | 0.481683  |
| O8   | -0.356710 | 0.524866  | -0.060470 |
| O9   | -0.785480 | 0.530107  | -0.196310 |

|     |           |           |           |
|-----|-----------|-----------|-----------|
| O10 | -0.498120 | 0.526844  | -0.770080 |
| O11 | -0.216540 | 0.523722  | -0.346290 |
| O12 | -0.068810 | 0.530602  | -0.637930 |
| O13 | -0.927390 | 0.530932  | -0.916100 |
| O14 | -0.654010 | 0.526732  | -0.481680 |
| O15 | -0.356710 | -0.024870 | -0.060470 |
| O16 | -0.785480 | -0.030110 | -0.196310 |
| O17 | -0.498120 | -0.026840 | -0.770080 |
| O18 | -0.216540 | -0.023720 | -0.346290 |
| O19 | -0.068810 | -0.030600 | -0.637930 |
| O20 | -0.927390 | -0.030930 | -0.916100 |
| O21 | -0.654010 | -0.026730 | -0.481680 |
| O22 | 0.356709  | 0.475134  | 0.060465  |
| O23 | 0.785475  | 0.469893  | 0.196306  |
| O24 | 0.498121  | 0.473156  | 0.770084  |
| O25 | 0.216536  | 0.476278  | 0.346294  |
| O26 | 0.068813  | 0.469398  | 0.637933  |
| O27 | 0.927391  | 0.469068  | 0.916095  |
| O28 | 0.654005  | 0.473268  | 0.481683  |
| O29 | 0.198009  | 0.250000  | 0.959462  |
| O30 | 0.614786  | 0.250000  | 0.097918  |
| O31 | 0.331704  | 0.250000  | 0.676042  |
| O32 | 0.059475  | 0.250000  | 0.245620  |
| O33 | 0.906508  | 0.250000  | 0.528084  |
| O34 | 0.760242  | 0.250000  | 0.811563  |
| O35 | 0.474002  | 0.250000  | 0.394183  |
| O36 | 0.420824  | 0.250000  | 0.933138  |
| O37 | 0.844772  | 0.250000  | 0.070550  |
| O38 | 0.555612  | 0.250000  | 0.640212  |
| O39 | 0.281305  | 0.250000  | 0.220026  |
| O40 | 0.132789  | 0.250000  | 0.513400  |
| O41 | 0.992621  | 0.250000  | 0.792628  |
| O42 | 0.695697  | 0.250000  | 0.352749  |
| O43 | -0.198010 | 0.750000  | -0.959460 |
| O44 | -0.614790 | 0.750000  | -0.097920 |
| O45 | -0.331700 | 0.750000  | -0.676040 |
| O46 | -0.059480 | 0.750000  | -0.245620 |
| O47 | -0.906510 | 0.750000  | -0.528080 |
| O48 | -0.760240 | 0.750000  | -0.811560 |
| O49 | -0.474000 | 0.750000  | -0.394180 |
| O50 | -0.420820 | 0.750000  | -0.933140 |
| O51 | -0.844770 | 0.750000  | -0.070550 |
| O52 | -0.555610 | 0.750000  | -0.640210 |
| O53 | -0.281310 | 0.750000  | -0.220030 |

|      |           |          |           |
|------|-----------|----------|-----------|
| O54  | -0.132790 | 0.750000 | -0.51340  |
| O55  | -0.992620 | 0.750000 | -0.792630 |
| O56  | -0.695700 | 0.750000 | -0.352750 |
| Si1  | 0.340420  | 0.250000 | 0.005836  |
| Si2  | 0.751724  | 0.250000 | 0.137589  |
| Si3  | 0.476914  | 0.250000 | 0.713706  |
| Si4  | 0.200632  | 0.250000 | 0.292318  |
| Si5  | 0.039110  | 0.250000 | 0.578038  |
| Si6  | 0.894808  | 0.250000 | 0.856011  |
| Si7  | 0.614530  | 0.250000 | 0.428549  |
| Si8  | -0.340420 | 0.750000 | -0.005840 |
| Si9  | -0.751720 | 0.750000 | -0.137590 |
| Si10 | -0.476910 | 0.750000 | -0.713710 |
| Si11 | -0.200630 | 0.750000 | -0.292320 |
| Si12 | -0.039110 | 0.750000 | -0.578040 |
| Si13 | -0.894810 | 0.750000 | -0.856010 |
| Si14 | -0.614530 | 0.750000 | -0.428550 |

**Table S6** The fractional coordinates of atoms in  $\text{Ca}_2\text{SiO}_4$ .

| Atom | Fractional coordinates |           |           |
|------|------------------------|-----------|-----------|
|      | u                      | v         | w         |
| Ca1  | 0.228483               | 0.339181  | 0.429580  |
| Ca2  | 0.224207               | -0.003760 | 0.703924  |
| Ca3  | 0.271517               | 0.839181  | 0.070420  |
| Ca4  | 0.275793               | 0.496241  | -0.203920 |
| Ca5  | -0.228480              | -0.339180 | -0.429580 |
| Ca6  | -0.224210              | 0.003759  | -0.703920 |
| Ca7  | 0.728483               | 0.160819  | 0.929580  |
| Ca8  | 0.724207               | 0.503759  | 1.203924  |
| O1   | 0.219663               | 0.011419  | 0.444317  |
| O2   | 0.014682               | 0.667842  | 0.364502  |
| O3   | 0.475601               | 0.750073  | 0.305485  |
| O4   | 0.350156               | 0.670661  | 0.572730  |
| O5   | 0.280337               | 0.511419  | 0.055683  |
| O6   | 0.485318               | 1.167842  | 0.135498  |
| O7   | 0.024399               | 1.250073  | 0.194515  |
| O8   | 0.149844               | 1.170661  | -0.072730 |
| O9   | -0.219660              | -0.011420 | -0.444317 |
| O10  | -0.014680              | -0.667840 | -0.364502 |
| O11  | -0.475600              | -0.750070 | -0.305485 |
| O12  | -0.350160              | -0.670660 | -0.572730 |
| O13  | 0.719663               | 0.488581  | 0.944317  |
| O14  | 0.514682               | -0.167840 | 0.864502  |
| O15  | 0.975601               | -0.250070 | 0.805485  |

|     |           |           |           |
|-----|-----------|-----------|-----------|
| O16 | 0.850156  | -0.170660 | 1.072730  |
| Si1 | 0.267837  | 0.780610  | 0.419122  |
| Si2 | 0.232163  | 1.280610  | 0.080878  |
| Si3 | -0.267840 | -0.780610 | -0.419120 |
| Si4 | 0.767837  | -0.280610 | 0.919122  |

---
